RESEARCH ARTICLE

# Organic Tracers from Asphalt in Propolis Produced by Urban Honey Bees, *Apis mellifera* Linn.

Abdulaziz S. Alqarni<sup>1</sup>, Ahmed I. Rushdi<sup>2,3,4\*</sup>, Ayman A. Owayss<sup>1</sup>, Hael S. Raweh<sup>1</sup>, Aarif H. El-Mubarak<sup>2</sup>, Bernd R. T. Simoneit<sup>2,5</sup>

**1** Department of Plant Protection, College of Food and Agriculture Sciences, King Saud University, Riyadh, 11451, Saudi Arabia, **2** Chair of Green Energy Research, College of Food and Agriculture Sciences, King Saud University, Riyadh, 11451, Saudi Arabia, **3** College of Earth, Oceanic and Atmospheric Sciences, Oregon State University, Corvallis, Oregon, 97333, United States of America, **4** Department of Earth and Environmental Sciences, Sana'a University, Sana'a, Yemen, **5** Department of Chemistry, Oregon State University, Corvallis, Oregon, 97331, United States of America

\* [arusldi@ksu.edu.sa](mailto:arusldi@ksu.edu.sa)

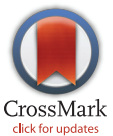

OPEN ACCESS

**Citation:** Alqarni AS, Rushdi AI, Owayss AA, Raweh HS, El-Mubarak AH, Simoneit BRT (2015) Organic Tracers from Asphalt in Propolis Produced by Urban Honey Bees, *Apis mellifera* Linn. PLoS ONE 10(6): e0128311. doi:10.1371/journal.pone.0128311

**Academic Editor:** Horacio Bach, University of British Columbia, CANADA

**Received:** November 13, 2014

**Accepted:** April 26, 2015

**Published:** June 15, 2015

**Copyright:** © 2015 Alqarni et al. This is an open access article distributed under the terms of the [Creative Commons Attribution License](https://creativecommons.org/licenses/by/4.0/), which permits unrestricted use, distribution, and reproduction in any medium, provided the original author and source are credited.

**Data Availability Statement:** All relevant data are within the paper and its Supporting Information files.

**Funding:** This project was funded by the National Plan for Scientific Technology and Innovation (MAARIFAH), King Abdulaziz City for Science and Technology, Kingdom of Saudi Arabia, Awards Numbers (12-AGR2510.02 and 09-ENV842-02). BRTS thanks the Distinguished Scientist Program of King Saud University for partial support. The funders had no role in study design, data collection and analysis, decision to publish, or preparation of the manuscript.

## Abstract

Propolis is a gummy material produced by honey bees to protect their hives and currently has drawn the attention of researchers due to its broad clinical use. It has been reported, based only on observations, that honey bees also collect other non-vegetation substances such as paint or asphalt/tar to make propolis. Therefore, propolis samples were collected from bee hives in Riyadh and Al-Bahah, a natural area, Saudi Arabia to determine their compositional characteristics and possible sources of the neutral organic compounds. The samples were extracted with hexane and analyzed by gas chromatography-mass spectrometry. The results showed that the major compounds were *n*-alkanes, *n*-alkenes, methyl *n*-alkanoates, long chain wax esters, triterpenoids and hopanes. The *n*-alkanes (ranging from C<sub>17</sub> to C<sub>40</sub>) were significant with relative concentrations varying from 23.8 to 56.8% (mean = 44.9±9.4%) of the total extracts. Their odd carbon preference index (CPI) ranged from 3.6 to 7.7, with a maximum concentration at heptacosane indicating inputs from higher plant vegetation wax. The relative concentrations of the *n*-alkenes varied from 23.8 to 41.19% (mean = 35.6±5.1%), with CPI = 12.4-31.4, range from C<sub>25</sub> to C<sub>35</sub> and maximum at tritriacontane. Methyl *n*-alkanoates, ranged from C<sub>12</sub> to C<sub>26</sub> as acids, with concentrations from 3.11 to 33.2% (mean = 9.6±9.5%). Long chain wax esters and triterpenoids were minor. The main triterpenoids were α- and β-amyrins, amyrones and amyryl acetates. The presence of hopanes in some total extracts (up to 12.5%) indicated that the bees also collected petroleum derivatives from vicinal asphalt and used that as an additional ingredient to make propolis. Therefore, caution should be taken when considering the chemical compositions of propolis as potential sources of natural products for biological and pharmacological applications. Moreover, beekeepers should be aware of the proper source of propolis in the flight range of their bee colonies.

**Competing Interests:** The authors have declared that no competing interests exist.

## Introduction

Honey bees collect waxy/resinous/gummy substances from different parts of plants, such as buds, leaves, stems and flowers, to make a sticky material known as propolis [1], which they utilize to protect their hives from invaders and infection by bacteria and fungi [2]. Furthermore, honey bees use the propolis to regulate nest temperature, light and humidity for optimum conditions [3,4]. In ancient times, propolis was used as a remedy against some diseases [5]. Recent studies have shown that propolis has biological activities, which are related to its different chemical compositions [6]. Thus, propolis has drawn the attention of researchers due to its broad clinical use as an antibiotic against emerging strains of pathogens resistant to synthetic antibiotics. The assorted chemical compositions and biological activities of propolis depend on the plant sources and collecting season [5]. The three possible sources of the organic components of propolis are plants, secreted substances from honey bee metabolism, and extraneous materials introduced during propolis formulation [1]. Propolis is normally composed of resin and vegetable balsam (50%), wax (30%), essential and aromatic oils (10%), pollen (5%) and other substances (5%) [7,8]. Therefore, the variations in chemical composition and biological activities of propolis gathered from different geographical locales are important for pharmaceutical purposes [9].

Some researchers and apiarists reported that honey bees would likely collect other substances such as paints, mineral oils or asphaltic tar to make bee glue-like substance (propolis) when vegetation was scarce in an area [10–12]. The researchers of this work have observed honey bees collecting matter from asphalt, which was also observed by others [12]. Saudi Arabia is located in western Asia with arid climatic conditions that endowed the country with a limited number of flowering plants. Few studies have been conducted to investigate the chemical components of propolis from Saudi Arabia [13].

The purposes of this study are to determine the characteristics and sources of the organic chemical components of propolis made by honey bees in an arid urban region, and to examine if the honey bees are specifically selective in collecting ingredients to make propolis or collect any sticky substance from diverse sources including anthropogenic materials. Thus, we collected propolis from bee hives in the city of Riyadh, Saudi Arabia, where construction activities including road paving (presence of fresh asphalt) are in progress and the locale lacks resinous plants.

## Methodology

### Propolis and asphalt sampling

Propolis samples were collected from honey bee colonies at the Bee Research Unit (BRU), King Saud University in Riyadh. The site is located in the northeastern outskirts of the city (Fig 1) and observed to have less vegetation cover with heavy construction activities including road paving with asphalt. A control propolis sample was collected from the rural region of Al-Bahah in southwestern Saudi Arabia (Fig 1). Propolis was sampled from replicated honey bee colonies of the indigenous race, *Apis mellifera jemenitica*, reared in modern Langstroth hives. The samples were collected from propolis adhering above and between combs by scratching with a pre-cleaned stainless steel spatula. Any hive impurities were excluded and samples were stored in glass jars and transferred to the laboratory for chemical analysis. Also, a fresh asphalt sample was collected from the surroundings of the apiary where construction activities were in progress.

### Soil and atmospheric particulate matter (PM) sampling

Surface oil and atmospheric particulate matter (PM) samples were collected from different sites in the city of Riyadh to characterize their solvent extractable lipid contents by gas

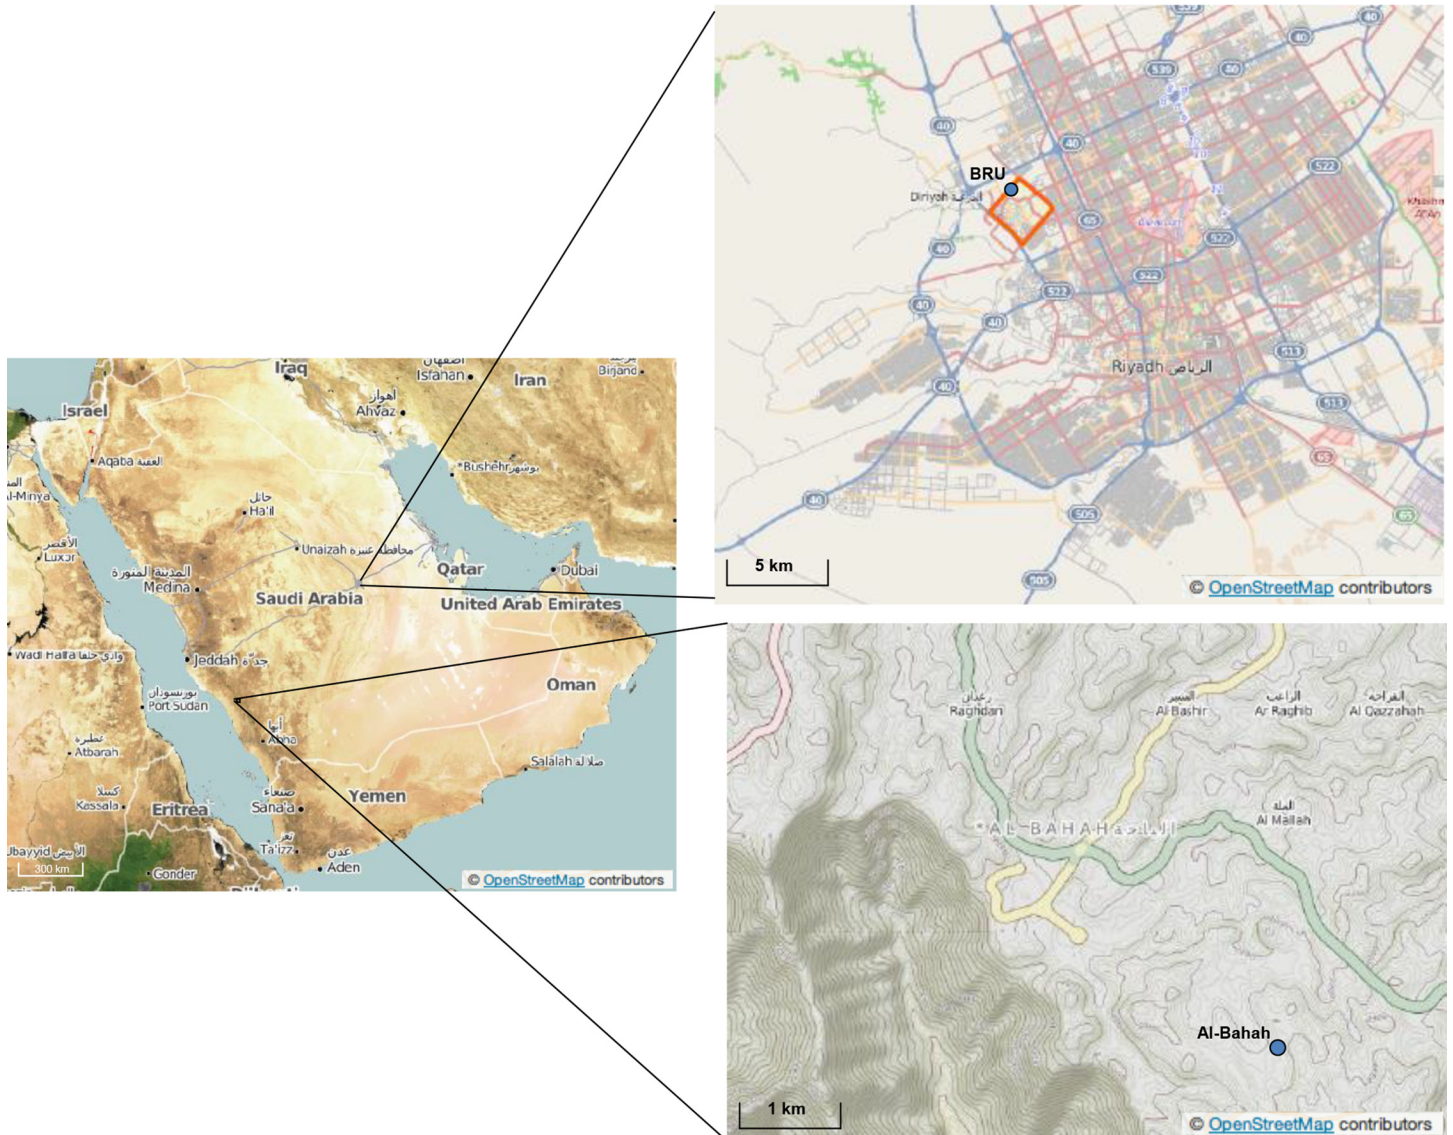

**Fig 1.** Map showing the location of the propolis sample collection in Riyadh (BRU) and Al-Bahah, Saudi Arabia (“OpenStreetMap contributors”, <http://www.openstreetmap.org>).

doi:10.1371/journal.pone.0128311.g001

chromatography-mass spectrometry (GC-MS) analysis. The first surface soil (D-S) sample was collected from a low traffic area in King Saud University near the honey bee hives at the BUR, and the second (O-S) sample was from a heavy traffic area in the city center (S1 Fig). The atmospheric PM (D-PM) sample was taken on the roof of a building (~10 m above ground) near the BUR (S1 Fig). The surface soil samples were taken by scraping the uppermost layer (~1 cm) of soil in a 30 cm<sup>2</sup> area of exposed surface, whereas the PM sample was collected on a quartz fiber filter (QMA, 20.3 x 25.4 cm) using a high volume air sampler. Before sampling, filters were heated to 600°C in order to lower their background contaminant levels, and then placed in cleaned pre-extracted aluminum containers. A weighed filter was put in the sampler and the PM was collected at flow rate of 1.2 m<sup>3</sup> min<sup>-1</sup> for about 24 hours.

## Sample extraction

About 5 g of each propolis sample was extracted three times ultrasonically with 20 mL of hexane for a 15 min period each in a 150 mL precleaned and annealed beaker. Hexane dissolves mainly non-polar compounds such as hydrocarbons. The combined extract was filtered through an annealed glass fiber filter to remove the undissolved propolis particles. The filtrate was first concentrated on a rotary evaporator and then reduced using a stream of dry nitrogen gas to a volume of approximately 200  $\mu$ L. The volume was finally adjusted to exactly 500  $\mu$ L by hexane. About 5 g of fresh asphalt sample was rinsed with about 15 ml hexane in a precleaned and annealed beaker, and filtered using a glass fiber filter. The filtrate was also adjusted to a 500  $\mu$ L final volume.

After air drying, each soil sample was sieved to obtain the fine particles (<125  $\mu$ m) before extraction of the total soluble organic matter (SOM). The extraction for soil and filter was performed twice by adding a mixture of dichloromethane/methanol (40 mL 3:1 v/v) to about 5 g of the particles of each soil sample and the filter, ultra-sonicating for 20 min, and then filtering through pre-extracted glass microfibre filters (*Whatman*, GF/A filters). Each total SOM extract was concentrated under nitrogen blow-down at room temperature to approximately 1.0–1.5 mL before GC-MS analysis.

## Instrumental Analysis

The chemical analysis was carried out by GC-MS with a Hewlett-Packard 6890 gas chromatograph coupled to a 5973 Mass Selective Detector, using a DB-5MS (Agilent) fused silica capillary column (30 m x 0.25 mm i.d., 0.25  $\mu$ m film thickness) and helium as carrier gas. The GC was temperature programmed from 65°C (2 min initial time) to 310°C at 6°C min (isothermal for 20 min final time) and the MS was operated in the electron impact mode at 70 eV ion source energy. Full scan mass spectrometric data were acquired and processed using the GC-MS ChemStation data system.

## Identification and Quantification

The compounds were identified using the GC-MS response data (i.e. key ion fragmentograms and mass spectra). Retention times and response factors were compared with those of external authentic standards including *n*-alkanes, *n*-alkenes, methyl *n*-alkanoates, sterols, terpenoids, and literature and library data. Unknown compounds were characterized by interpretation of the fragmentation pattern of their mass spectra. The identification of *n*-alkanes, *n*-alkenes, *n*-alkanoates, methyl *n*-alkanoates, wax esters, triterpenoids and hopane biomarkers were based mainly on their mass spectra [i.e. key ions *m/z* 85, 97, 82, 74/87, 257, 218/189 and 191, respectively], and gas chromatographic retention times. Quantifications (relative concentrations of compounds in %) were performed on the peak areas of the compounds derived from the GC-MS total ion or key ion chromatogram profiles. Average response factors were calculated for each compound.

## Statistical analysis

The data set was statistically analyzed by cluster analysis and principal component analysis (PCA) techniques using the SPSS (IBM-Statistical Package for the Social Sciences, version 21) software to assess the similarity and dissimilarity among the different propolis samples.

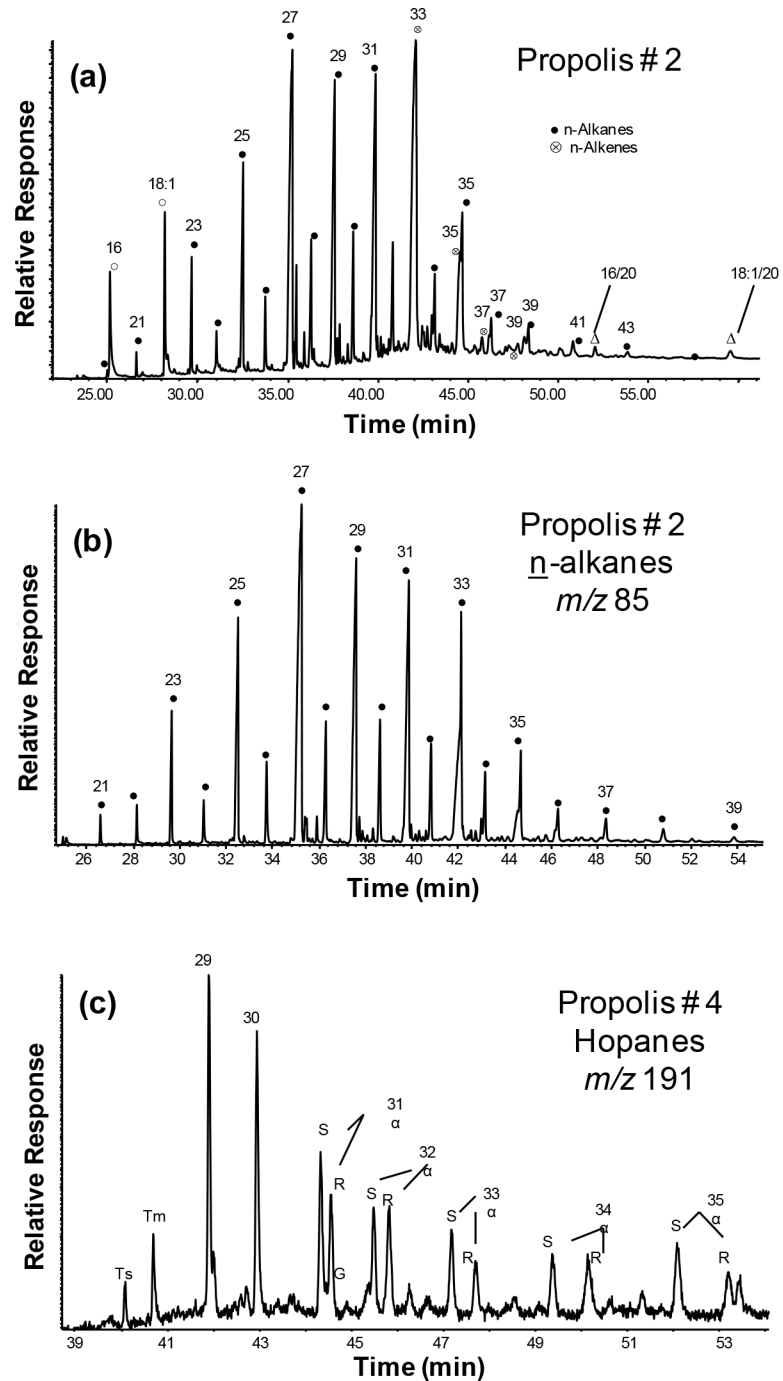

**Fig 2. GC-MS total ion current (TIC) trace showing the major organic tracers in propolis sample D2 (a) and typical GC-MS key ion plots for (b) n-alkanes and (c) hopanes.**

doi:10.1371/journal.pone.0128311.g002

## Results and Discussion

The general features of the GC-MS results for the total hexane extractable organic matter (EOM) from the propolis and asphalt samples are shown in Figs 2 and 3, respectively. The major compounds identified were n-alkanes, n-alkenes, n-alkanals, methyl n-alkanoates, wax

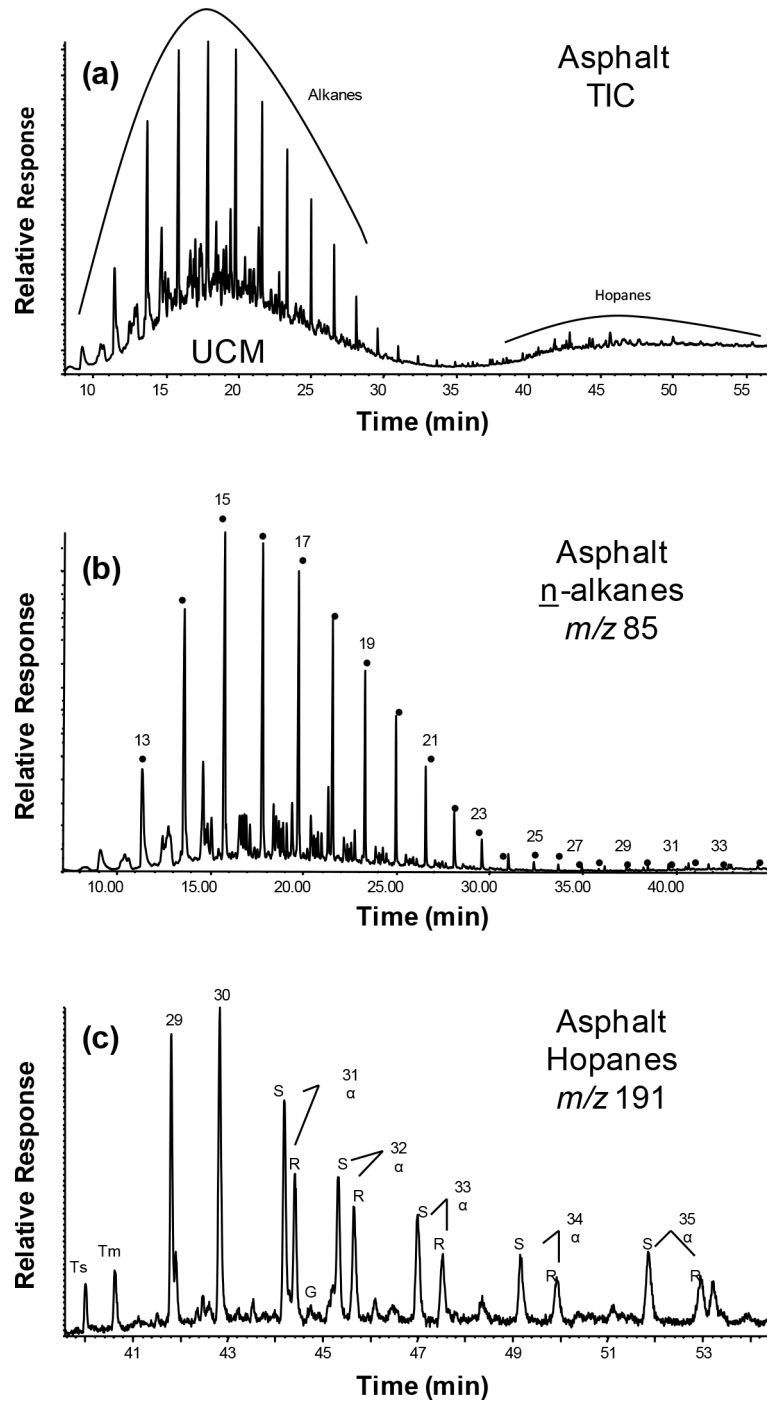

**Fig 3.** TIC trace showing the major organic tracers in the asphalt sample (a) and typical key ion plots for (b) *n*-alkanes and (c) hopanes.

doi:10.1371/journal.pone.0128311.g003

esters, triterpenoids and hopanes, and their relative concentrations are given in [Table 1](#). The presence and distribution patterns of these compounds in propolis can be utilized to identify their sources. Accordingly, comparisons are possible between known sources and observed organic compound mixtures in the propolis and asphalt samples.

Table 1. Relative concentrations (%) of the different compounds from various propolis and asphalt samples collected from Riyadh (D) and Al-Bahah (C), Saudi Arabia.

| Compound                   | Composition W.                  | D1           | D2           | D3           | D4           | D5           | D6           | D7           | D9           | D10          | D11          | C            | Mean         | SD          | Asphalt      |
|----------------------------|---------------------------------|--------------|--------------|--------------|--------------|--------------|--------------|--------------|--------------|--------------|--------------|--------------|--------------|-------------|--------------|
| <b>n-Alkanes</b>           |                                 |              |              |              |              |              |              |              |              |              |              |              |              |             |              |
| Dodecane                   | C <sub>12</sub> H <sub>26</sub> | 170          | N.D.         | N.D.         | N.D.         | N.D.         | N.D.         | N.D.         | N.D.         | N.D.         | N.D.         | N.D.         | N.D.         | N.D.        | 1.1          |
| Tridecane                  | C <sub>13</sub> H <sub>28</sub> | 184          | N.D.         | N.D.         | N.D.         | N.D.         | N.D.         | N.D.         | N.D.         | N.D.         | N.D.         | N.D.         | N.D.         | N.D.        | 3.77         |
| Tetradecane                | C <sub>14</sub> H <sub>30</sub> | 198          | N.D.         | N.D.         | N.D.         | N.D.         | N.D.         | N.D.         | N.D.         | N.D.         | N.D.         | N.D.         | N.D.         | N.D.        | 6.18         |
| Pentadecane                | C <sub>15</sub> H <sub>32</sub> | 212          | N.D.         | N.D.         | N.D.         | N.D.         | N.D.         | N.D.         | N.D.         | N.D.         | N.D.         | N.D.         | N.D.         | N.D.        | 7.23         |
| Hexadecane                 | C <sub>16</sub> H <sub>34</sub> | 226          | N.D.         | N.D.         | N.D.         | N.D.         | N.D.         | N.D.         | N.D.         | N.D.         | N.D.         | N.D.         | N.D.         | N.D.        | 6.48         |
| Heptadecane                | C <sub>17</sub> H <sub>36</sub> | 240          | 0.02         | N.D.         | N.D.         | N.D.         | N.D.         | N.D.         | N.D.         | N.D.         | N.D.         | N.D.         | N.D.         | N.D.        | 5.09         |
| Octadecane                 | C <sub>18</sub> H <sub>38</sub> | 256          | 0.06         | N.D.         | N.D.         | N.D.         | N.D.         | N.D.         | N.D.         | N.D.         | N.D.         | N.D.         | N.D.         | N.D.        | 3.58         |
| Nonadecane                 | C <sub>19</sub> H <sub>40</sub> | 268          | 0.11         | N.D.         | N.D.         | 0.12         | N.D.         | 0.09         | 0.05         | 0.1          | 0.06         | N.D.         | N.D.         | N.D.        | 2.56         |
| Eicosane                   | C <sub>20</sub> H <sub>42</sub> | 282          | 0.15         | 0.13         | 0.12         | 0.24         | N.D.         | 0.09         | 0.09         | 0.13         | 0.06         | N.D.         | 0.63         | N.D.        | 1.83         |
| Hehicosane                 | C <sub>21</sub> H <sub>44</sub> | 296          | 0.27         | 0.25         | 0.24         | 0.24         | 0.24         | 0.09         | 0.27         | 0.26         | 0.34         | 0.26         | 0.63         | N.D.        | 1.25         |
| Docosane                   | C <sub>22</sub> H <sub>46</sub> | 310          | 0.55         | 0.38         | 0.48         | 0.83         | 0.24         | 1.06         | 0.51         | 1.74         | 0.33         | 0.53         | 3.04         | N.D.        | 0.79         |
| Tricosane                  | C <sub>23</sub> H <sub>48</sub> | 324          | 0.83         | 1.76         | 0.84         | 0.83         | 1.7          | 0.53         | 1.09         | 0.98         | 1.74         | 1.46         | 2.14         | N.D.        | 0.42         |
| Tetracosane                | C <sub>24</sub> H <sub>50</sub> | 338          | 0.31         | 0.5          | 0.36         | 0.48         | 0.36         | 0.18         | 0.74         | 0.32         | 0.41         | 0.26         | 1.64         | N.D.        | 0.22         |
| Pentacosane                | C <sub>25</sub> H <sub>52</sub> | 352          | 4.58         | 4.27         | 2.65         | 2.61         | 4.61         | 2.03         | 3.69         | 3.95         | 4.62         | 3.71         | 10.00        | N.D.        | 0.13         |
| Hexacosane                 | C <sub>26</sub> H <sub>54</sub> | 366          | 0.54         | 1.26         | 0.72         | 0.83         | 0.73         | 0.26         | 1.62         | 0.69         | 1.12         | 0.79         | 2.93         | N.D.        | 0.08         |
| Heptacosane                | C <sub>27</sub> H <sub>56</sub> | 380          | 9.57         | 13.31        | 8.81         | 9.62         | 13.94        | 5.3          | 11.37        | 9.51         | 13.5         | 10.33        | 29.10        | N.D.        | 0.05         |
| Octacosane                 | C <sub>28</sub> H <sub>58</sub> | 394          | 0.65         | 1.76         | 1.21         | 1.43         | 0.97         | 0.26         | 2.32         | 0.91         | 1.53         | 1.32         | 1.67         | N.D.        | 0.05         |
| Nonacosane                 | C <sub>29</sub> H <sub>60</sub> | 408          | 4.69         | 8.04         | 5.07         | 6.65         | 7.03         | 2.91         | 6.8          | 5.6          | 7.14         | 6.22         | 5.03         | N.D.        | 0.07         |
| Triacotane                 | C <sub>30</sub> H <sub>62</sub> | 422          | 0.73         | 1.88         | 1.21         | 1.78         | 0.97         | 0.26         | 2.41         | 1.1          | 1.53         | 1.32         | 0.82         | N.D.        | 0.06         |
| Henitriacotane             | C <sub>31</sub> H <sub>64</sub> | 436          | 5.67         | 7.16         | 5.67         | 7.48         | 7.03         | 3.8          | 7.88         | 6.36         | 6.83         | 7.02         | 2.23         | N.D.        | 0.08         |
| Dotriacotane               | C <sub>32</sub> H <sub>66</sub> | 450          | 0.7          | 1.63         | 0.97         | 1.43         | 0.85         | 0.35         | 1.92         | 1.07         | 1.12         | 1.19         | 0.56         | N.D.        | 0.07         |
| Tritriacotane              | C <sub>33</sub> H <sub>68</sub> | 464          | 6.81         | 6.78         | 6.52         | 6.89         | 8.49         | 5.03         | 8.04         | 7.49         | 6.91         | 8.87         | 3.31         | N.D.        | 0.08         |
| Tetrtiactotane             | C <sub>34</sub> H <sub>70</sub> | 478          | 0.42         | 1.38         | 0.48         | 0.95         | 0.36         | 0.18         | 1.13         | 0.56         | 0.49         | 0.53         | 0.34         | N.D.        | 0.06         |
| Pentatitriactotane         | C <sub>35</sub> H <sub>72</sub> | 492          | 1.01         | 2.39         | 1.21         | 1.43         | 2.43         | 0.26         | 1.54         | 0.6          | 2.21         | 1.99         | 1.03         | N.D.        | 0.06         |
| Hexatitriactotane          | C <sub>36</sub> H <sub>74</sub> | 506          | 0.3          | 0.88         | 0.97         | 0.83         | 0.49         | 0.97         | 0.67         | 0.31         | 0.48         | 0.4          | 0.16         | N.D.        | 0.06         |
| Heptatitriactotane         | C <sub>37</sub> H <sub>76</sub> | 520          | 0.18         | 0.75         | 0.24         | 0.48         | 0.12         | N.D.         | 0.39         | N.D.         | 0.22         | 0.26         | N.D.         | N.D.        | N.D.         |
| Octatitriactotane          | C <sub>38</sub> H <sub>78</sub> | 534          | N.D.         | 0.38         | N.D.         | N.D.         | 0.12         | N.D.         | N.D.         | N.D.         | N.D.         | 0.13         | N.D.         | N.D.        | N.D.         |
| Nonatitriactotane          | C <sub>39</sub> H <sub>80</sub> | 548          | N.D.         | 0.13         | N.D.         | N.D.         | N.D.         | N.D.         | N.D.         | N.D.         | N.D.         | N.D.         | N.D.         | N.D.        | N.D.         |
| <b>Total</b>               |                                 | <b>38.15</b> | <b>54.99</b> | <b>37.77</b> | <b>45.13</b> | <b>50.68</b> | <b>23.66</b> | <b>52.52</b> | <b>41.79</b> | <b>50.64</b> | <b>46.62</b> | <b>63.97</b> | <b>44.19</b> | <b>9.32</b> | <b>41.35</b> |
| CPI (o/e) <sup>a</sup>     |                                 | 7.5          | 4.4          | 4.6          | 4.1          | 8.5          | 5.5          | 3.6          | 5            | 6.1          | 5.9          | 5.1          | 5.5          | 1.5         |              |
| Plant Wax (%) <sup>b</sup> |                                 | 28.97        | 33.33        | 24.68        | 27.61        | 39.22        | 17.44        | 29.21        | 28.88        | 34.96        | 32.64        | 42.88        | 29.69        | 5.98        | 0.01         |
| Synthetic beewax (%)       |                                 | 9.18         | 21.66        | 13.09        | 17.52        | 11.46        | 6.22         | 23.31        | 12.91        | 15.68        | 13.97        | 21.08        | 14.5         | 5.27        | 41.34        |
| <b>n-Alkenes</b>           |                                 |              |              |              |              |              |              |              |              |              |              |              |              |             |              |
| Tridecene                  | C <sub>13</sub> H <sub>26</sub> | 182          | N.D.         | N.D.         | N.D.         | N.D.         | N.D.         | N.D.         | N.D.         | N.D.         | N.D.         | N.D.         | N.D.         | N.D.        | 0.05         |
| Tetradecene                | C <sub>14</sub> H <sub>28</sub> | 196          | N.D.         | N.D.         | N.D.         | N.D.         | N.D.         | N.D.         | N.D.         | N.D.         | N.D.         | N.D.         | N.D.         | N.D.        | 0.06         |
| Pentadecene                | C <sub>15</sub> H <sub>30</sub> | 210          | N.D.         | N.D.         | N.D.         | N.D.         | N.D.         | N.D.         | N.D.         | N.D.         | N.D.         | N.D.         | N.D.         | N.D.        | 0.07         |
| Hexadecene                 | C <sub>16</sub> H <sub>32</sub> | 224          | N.D.         | N.D.         | N.D.         | N.D.         | N.D.         | N.D.         | N.D.         | N.D.         | N.D.         | N.D.         | N.D.         | N.D.        | 0.06         |
| Heptadecene                | C <sub>17</sub> H <sub>34</sub> | 238          | N.D.         | N.D.         | N.D.         | N.D.         | N.D.         | N.D.         | N.D.         | N.D.         | N.D.         | N.D.         | N.D.         | N.D.        | 0.04         |

(Continued)

Table 1. (Continued)

| Compound                   | Composition W.                                 | D1           | D2           | D3           | D4           | D5           | D6           | D7           | D9          | D10          | D11          | C            | Mean         | SD          | Asphalt      |          |
|----------------------------|------------------------------------------------|--------------|--------------|--------------|--------------|--------------|--------------|--------------|-------------|--------------|--------------|--------------|--------------|-------------|--------------|----------|
| Octadecene                 | C <sub>18</sub> H <sub>36</sub>                | 252          | N.D.         | N.D.         | N.D.         | N.D.         | N.D.         | N.D.         | N.D.        | N.D.         | N.D.         | N.D.         | N.D.         | N.D.        | 0.03         |          |
| Nonadecene                 | C <sub>19</sub> H <sub>38</sub>                | 266          | N.D.         | N.D.         | N.D.         | N.D.         | N.D.         | N.D.         | N.D.        | N.D.         | N.D.         | N.D.         | N.D.         | N.D.        | 0.03         |          |
| Eicosene                   | C <sub>20</sub> H <sub>40</sub>                | 280          | N.D.         | N.D.         | N.D.         | N.D.         | N.D.         | N.D.         | N.D.        | N.D.         | N.D.         | N.D.         | N.D.         | N.D.        | 0.01         |          |
| Heineicosene               | C <sub>21</sub> H <sub>42</sub>                | 294          | N.D.         | N.D.         | N.D.         | N.D.         | N.D.         | N.D.         | N.D.        | N.D.         | N.D.         | N.D.         | N.D.         | N.D.        | 0.01         |          |
| Docosene                   | C <sub>22</sub> H <sub>44</sub>                | 308          | N.D.         | N.D.         | N.D.         | N.D.         | N.D.         | N.D.         | N.D.        | N.D.         | N.D.         | N.D.         | N.D.         | N.D.        | 0.01         |          |
| Tricosene                  | C <sub>23</sub> H <sub>46</sub>                | 322          | N.D.         | N.D.         | N.D.         | N.D.         | N.D.         | N.D.         | N.D.        | N.D.         | N.D.         | N.D.         | N.D.         | N.D.        | N.D.         |          |
| Tetracosene                | C <sub>24</sub> H <sub>48</sub>                | 336          | N.D.         | N.D.         | N.D.         | N.D.         | N.D.         | N.D.         | N.D.        | N.D.         | N.D.         | N.D.         | N.D.         | N.D.        | N.D.         |          |
| Pentacosene                | C <sub>25</sub> H <sub>50</sub>                | 350          | 0.15         | 0.11         | 0.07         | 0.1          | 0.18         | 0.07         | 0.02        | 0.1          | 0.06         | 0.23         | N.D.         | N.D.        | N.D.         |          |
| Hexacosene                 | C <sub>26</sub> H <sub>52</sub>                | 364          | 0.17         | 0.33         | 0.22         | 0.25         | 0.21         | 0.07         | 0.48        | 0.22         | 0.23         | 0.24         | N.D.         | N.D.        | N.D.         |          |
| Heptacosene                | C <sub>27</sub> H <sub>54</sub>                | 378          | 0.2          | 0.04         | 0.05         | 0.07         | 0.05         | 0.11         | 0.01        | 0.18         | 0.02         | 0.13         | N.D.         | N.D.        | N.D.         |          |
| Octacosene                 | C <sub>28</sub> H <sub>56</sub>                | 392          | 0.25         | 0.03         | 0.04         | 0.05         | 0.01         | 0.04         | 0.04        | 0.25         | 0.01         | 0.07         | N.D.         | N.D.        | 0.01         |          |
| Nonacosene                 | C <sub>29</sub> H <sub>58</sub>                | 406          | 0.38         | 2.95         | 1.89         | 2.95         | 2.72         | 1.32         | 2.28        | 2.56         | 2.27         | 2.61         | N.D.         | N.D.        | N.D.         |          |
| Triacotene                 | C <sub>30</sub> H <sub>60</sub>                | 420          | 0.36         | 0.75         | 0.54         | 0.72         | 0.41         | 0.1          | 0.61        | 0.38         | 0.62         | 0.56         | 0.19         | N.D.        | N.D.         |          |
| Henriacontene              | C <sub>31</sub> H <sub>62</sub>                | 434          | 9.2          | 6            | 6.32         | 8.27         | 6.37         | 5.07         | 8.33        | 2.46         | 5.82         | 7.26         | 0.95         | N.D.        | N.D.         |          |
| Dotriacontene              | C <sub>32</sub> H <sub>64</sub>                | 448          | 0.84         | 1            | 0.84         | 1.05         | 0.81         | 0.44         | 1.27        | 0.95         | 0.84         | 1.17         | 0.37         | N.D.        | N.D.         |          |
| Tritriacontene             | C <sub>33</sub> H <sub>66</sub>                | 462          | 24.34        | 20.58        | 20.65        | 21.15        | 26.49        | 16.02        | 24.13       | 25.16        | 22.56        | 28.13        | 12.93        | N.D.        | N.D.         |          |
| Tettriacontene             | C <sub>34</sub> H <sub>68</sub>                | 476          | 0.17         | 0.34         | 0.1          | 0.23         | 0.12         | 0.09         | 0.2         | 0.5          | 0.07         | 0.09         | 0.17         | N.D.        | N.D.         |          |
| Pentatriacontene           | C <sub>35</sub> H <sub>70</sub>                | 490          | 0.51         | 0.84         | 0.63         | 0.62         | 0.9          | 0.42         | 3.5         | 0.78         | 6.23         | 0.69         | 0.13         | N.D.        | N.D.         |          |
| <b>Total</b>               |                                                | <b>36.56</b> | <b>33.02</b> | <b>31.37</b> | <b>35.39</b> | <b>38.32</b> | <b>23.75</b> | <b>40.92</b> | <b>33.5</b> | <b>38.68</b> | <b>41.19</b> | <b>14.75</b> | <b>35.27</b> | <b>5.22</b> | <b>0.021</b> |          |
| CPI (o/e) <sup>a</sup>     |                                                | 19.5         | 12.4         | 17.1         | 14.5         | 23.4         | 31.4         | 14.8         | 13.6        | 20.7         | 19.5         | 19.08        | 18.6         | 5.7         | 0.6          |          |
| <b>n-Alkanals</b>          |                                                |              |              |              |              |              |              |              |             |              |              |              |              |             |              |          |
| Octadecanal                | C <sub>18</sub> H <sub>36</sub> O              | 268          | 0.34         | 0.13         | 0.25         | 0.35         | 0.08         | 0.26         | 0.06        | 0.05         | 0.1          | 0.18         | N.D.         | N.D.        | N.D.         |          |
| Eicosanal                  | C <sub>20</sub> H <sub>40</sub> O              | 296          | 0.65         | 0.24         | 0.69         | 0.9          | 0.18         | 0.8          | 0.74        | 0.15         | 0.18         | 0.4          | N.D.         | N.D.        | N.D.         |          |
| Docosanal                  | C <sub>22</sub> H <sub>44</sub> O              | 324          | N.D.         | 0.01         | 0.01         | 0.02         | N.D.         | 0.04         | 0.02        | 0.02         | N.D.         | 0.01         | N.D.         | N.D.        | N.D.         |          |
| Tetracosanal               | C <sub>24</sub> H <sub>48</sub> O              | 352          | 0.02         | 1.78         | 1.39         | 0.43         | 1.47         | 0.86         | 1.08        | 0.13         | 1.85         | 1.44         | T            | N.D.        | N.D.         |          |
| Hexacosanal                | C <sub>26</sub> H <sub>52</sub> O              | 380          | 0.1          | 0.61         | 1            | 0.17         | 0.55         | 0.77         | 0.38        | 0.05         | 0.56         | 0.51         | N.D.         | N.D.        | N.D.         |          |
| Octacosanal                | C <sub>28</sub> H <sub>56</sub> O              | 408          | 0.11         | 0.31         | 0.94         | 0.14         | 0.35         | 0.96         | 0.21        | 0.03         | 0.37         | 0.29         | N.D.         | N.D.        | N.D.         |          |
| Triacotanal                | C <sub>30</sub> H <sub>60</sub> O              | 436          | 0.07         | 0.37         | 1.61         | 0.21         | 0.52         | 1.87         | 0.42        | 0.02         | 0.61         | 0.35         | N.D.         | N.D.        | N.D.         |          |
| <b>Total</b>               |                                                | <b>1.3</b>   | <b>3.46</b>  | <b>5.88</b>  | <b>2.23</b>  | <b>3.14</b>  | <b>5.57</b>  | <b>2.9</b>   | <b>0.44</b> | <b>0.44</b>  | <b>3.66</b>  | <b>3.18</b>  | <b>T</b>     | <b>3.18</b> | <b>1.68</b>  | <b>0</b> |
| <b>Methyl n-alkanoates</b> |                                                |              |              |              |              |              |              |              |             |              |              |              |              |             |              |          |
| Methyl dodecanoate         | C <sub>13</sub> H <sub>26</sub> O <sub>2</sub> | 214          | 0.05         | 0.01         | 0.02         | 0.02         | 0.01         | 0.18         | 0.01        | 0.1          | 0.01         | 0.03         | 0.20         | N.D.        | N.D.         |          |
| Methyl tetradecanoate      | C <sub>15</sub> H <sub>30</sub> O <sub>2</sub> | 242          | 0.55         | 0.04         | 0.1          | 0.13         | 0.02         | 1.03         | 0.06        | 0.51         | 0.04         | 0.07         | 0.16         | N.D.        | N.D.         |          |
| Methyl hexadecanoate       | C <sub>17</sub> H <sub>34</sub> O <sub>2</sub> | 270          | 6.09         | 2.66         | 3.66         | 3.53         | 3.64         | 13.14        | 2.02        | 7.61         | 2.8          | 2.85         | 10.01        | N.D.        | N.D.         |          |
| Methyl octadecanoate       | C <sub>19</sub> H <sub>38</sub> O <sub>2</sub> | 296          | 6.65         | 0.5          | 1.38         | 1.91         | 0.5          | 13.42        | 0.67        | 4.04         | 0.3          | 0.78         | 0.74         | N.D.        | N.D.         |          |
| Methyl octadecanoate       | C <sub>19</sub> H <sub>38</sub> O <sub>2</sub> | 298          | 1.81         | 0.26         | 0.43         | 0.55         | 0.25         | 3.62         | 0.21        | 1.46         | 0.25         | 0.34         | 0.41         | N.D.        | N.D.         |          |
| Methyl eicosanoate         | C <sub>21</sub> H <sub>42</sub> O <sub>2</sub> | 326          | 0.46         | 0.05         | 0.1          | 0.13         | 0.04         | 0.92         | 0.05        | 0.28         | 0.02         | 0.07         | 0.01         | N.D.        | N.D.         |          |
| Methyl docosanoate         | C <sub>23</sub> H <sub>46</sub> O <sub>2</sub> | 354          | 0.14         | 0.04         | 0.04         | 0.05         | 0.04         | 0.35         | 0.02        | 0.09         | 0.02         | 0.05         | 0.10         | N.D.        | N.D.         |          |
| Methyl tetracosanoate      | C <sub>25</sub> H <sub>50</sub> O <sub>2</sub> | 382          | 0.2          | 0.11         | 0.07         | 0.08         | 0.11         | 0.46         | 0.06        | 0.15         | 0.11         | 0.21         | 0.43         | N.D.        | N.D.         |          |
| Methyl hexacosanoate       | C <sub>27</sub> H <sub>54</sub> O <sub>2</sub> | 410          | 0.05         | 0.03         | 0.01         | 0.01         | 0.01         | 0.09         | 0.01        | 0.03         | 0.01         | 0.04         | 0.08         | N.D.        | N.D.         |          |

(Continued)



Table 1. (Continued)

| Compound                             | Composition                                    | M. W. | D1           | D2          | D3           | D4          | D5          | D6           | D7          | D9           | D10         | D11         | C            | Mean        | SD          | Asphalt     |
|--------------------------------------|------------------------------------------------|-------|--------------|-------------|--------------|-------------|-------------|--------------|-------------|--------------|-------------|-------------|--------------|-------------|-------------|-------------|
| <b>Total</b>                         |                                                |       | <b>16.01</b> | <b>3.69</b> | <b>5.8</b>   | <b>6.41</b> | <b>4.62</b> | <b>33.21</b> | <b>3.11</b> | <b>14.26</b> | <b>3.58</b> | <b>4.45</b> | <b>12.31</b> | <b>9.51</b> | <b>9.48</b> |             |
| <b>Wax esters</b>                    |                                                |       |              |             |              |             |             |              |             |              |             |             |              |             |             |             |
| Tetracosanyl hexadecanoate           | C <sub>40</sub> H <sub>80</sub> O <sub>2</sub> | 592   | 0.33         | 1.8         | 4.57         | 0.46        | 1.79        | 4.31         | 0.72        | 1.14         | 2.99        | 0.13        | 0.13         |             |             | N.D.        |
| Hexacosanyl hexadecanoate            | C <sub>42</sub> H <sub>84</sub> O <sub>2</sub> | 620   | 1.31         | 0.58        | 0.39         | 0.43        | 0.17        | 0.21         | 0.43        | 0.12         | 0.12        | 0.2         | 0.36         |             |             | N.D.        |
| Octacosanyl hexadecanoate            | C <sub>44</sub> H <sub>88</sub> O <sub>2</sub> | 648   | 0.58         | 0.2         | 0.08         | 0.19        | 0.08        | 0.04         | 0.26        | N.D.         | 0.05        | 0.12        | N.D.         |             |             | N.D.        |
| <b>Total</b>                         |                                                |       | <b>2.22</b>  | <b>2.57</b> | <b>5.04</b>  | <b>1.08</b> | <b>2.05</b> | <b>4.56</b>  | <b>1.41</b> | <b>1.26</b>  | <b>3.14</b> | <b>0.45</b> | <b>0.49</b>  | <b>2.38</b> | <b>1.5</b>  |             |
| <b>Triterpenoids</b>                 |                                                |       |              |             |              |             |             |              |             |              |             |             |              |             |             |             |
| β-Amyrone                            | C <sub>30</sub> H <sub>48</sub> O              | 424   | 0.21         | 0.18        | 0.22         | 0.12        | 0.11        | 0.08         | 0.05        | N.D.         | 0.3         | 0.49        | 0.32         |             |             | N.D.        |
| α-Amyrone                            | C <sub>30</sub> H <sub>48</sub> O              | 424   | 0.26         | 0.63        | 0.48         | 0.12        | 0.61        | 0.09         | 0.11        | N.D.         | 0.64        | 1.59        | 2.33         |             |             | N.D.        |
| β-Amyrin                             | C <sub>30</sub> H <sub>50</sub> O              | 426   | 0.16         | 0.11        | 0.22         | 0.05        | 0.1         | 0.02         | 0.12        | N.D.         | 0.12        | 0.46        | 0.15         |             |             | N.D.        |
| α-Amyrin                             | C <sub>30</sub> H <sub>50</sub> O              | 426   | 0.16         | 0.09        | 0.13         | 0.01        | 0.23        | 0.03         | 0.07        | N.D.         | 0.11        | 0.53        | 1.22         |             |             | N.D.        |
| β-Amyryl acetate                     | C <sub>32</sub> H <sub>52</sub> O <sub>2</sub> | 468   | 0.11         | 0.36        | 0.21         | 0.05        | 1.1         | 0.02         | 0.07        | N.D.         | 0.21        | 1.24        | 0.65         |             |             | N.D.        |
| <b>Total</b>                         |                                                |       | <b>0.9</b>   | <b>1.37</b> | <b>1.25</b>  | <b>0.34</b> | <b>2.15</b> | <b>0.24</b>  | <b>0.43</b> |              | <b>1.38</b> | <b>4.31</b> | <b>4.76</b>  | <b>1.38</b> | <b>1.27</b> |             |
| <b>Hopane Biomarkers</b>             |                                                |       |              |             |              |             |             |              |             |              |             |             |              |             |             |             |
| Trisnorneohopane                     | C <sub>27</sub> H <sub>46</sub>                | 370   | 0.09         | N.D.        | 0.27         | 0.1         | N.D.        | 0.24         | N.D.        | 0.13         | N.D.        | 0.03        | N.D.         |             |             | 0.02        |
| 17α(H)-Trisnorhopane                 | C <sub>27</sub> H <sub>46</sub>                | 370   | 0.18         | N.D.        | 0.35         | 0.25        | N.D.        | 0.41         | N.D.        | 0.29         | N.D.        | 0.03        | N.D.         |             |             | 0.03        |
| 17α(H),21β(H)-Norhopane              | C <sub>29</sub> H <sub>50</sub>                | 398   | 0.95         | N.D.        | 1.76         | 1.18        | N.D.        | 2.42         | N.D.        | 1.32         | N.D.        | 0.16        | N.D.         |             |             | 0.18        |
| 17α(H),21β(H)-Hopane                 | C <sub>30</sub> H <sub>52</sub>                | 412   | 0.8          | N.D.        | 1.85         | 0.95        | N.D.        | 1.98         | N.D.        | 1.17         | N.D.        | 0.13        | N.D.         |             |             | 0.18        |
| 17α(H),21β(H)-22S-Homohopane         | C <sub>31</sub> H <sub>54</sub>                | 426   | 0.49         | N.D.        | 0.99         | 0.55        | N.D.        | 1.18         | N.D.        | 0.73         | N.D.        | 0.07        | N.D.         |             |             | 0.13        |
| 17α(H),21β(H)-22R-Homohopane         | C <sub>31</sub> H <sub>54</sub>                | 426   | 0.32         | N.D.        | 0.64         | 0.39        | N.D.        | 0.81         | N.D.        | 0.48         | N.D.        | 0.04        | N.D.         |             |             | 0.08        |
| Gammacerane                          | C <sub>30</sub> H <sub>52</sub>                | 412   | 0.02         | N.D.        | 0.01         | 0.02        | N.D.        | 0.11         | N.D.        | 0.07         | N.D.        | 0.01        | N.D.         |             |             | 0.01        |
| 17α(H),21β(H)-22S-Bishomohopane      | C <sub>32</sub> H <sub>56</sub>                | 440   | 0.3          | N.D.        | 0.59         | 0.34        | N.D.        | 0.74         | N.D.        | 0.47         | N.D.        | 0.04        | N.D.         |             |             | 0.13        |
| 17α(H),21β(H)-22R-Bishomohopane      | C <sub>32</sub> H <sub>56</sub>                | 440   | 0.35         | N.D.        | 0.83         | 0.55        | N.D.        | 0.71         | N.D.        | 0.56         | N.D.        | 0.05        | N.D.         |             |             | 0.08        |
| 17α(H),21β(H)-22S-Trishomohopane     | C <sub>33</sub> H <sub>58</sub>                | 454   | 0.31         | N.D.        | 0.58         | 0.43        | N.D.        | 0.75         | N.D.        | 0.51         | N.D.        | 0.04        | N.D.         |             |             | 0.09        |
| 17α(H),21β(H)-22R-Trishomohopane     | C <sub>33</sub> H <sub>58</sub>                | 454   | 0.22         | N.D.        | 0.54         | 0.26        | N.D.        | 0.5          | N.D.        | 0.31         | N.D.        | 0.04        | N.D.         |             |             | 0.06        |
| 17α(H),21β(H)-22S-Tetrakishomohopane | C <sub>34</sub> H <sub>60</sub>                | 468   | 0.27         | N.D.        | 0.45         | 0.33        | N.D.        | 0.7          | N.D.        | 0.44         | N.D.        | 0.05        | N.D.         |             |             | 0.06        |
| 17α(H),21β(H)-22R-Tetrakishomohopane | C <sub>34</sub> H <sub>60</sub>                | 468   | 0.2          | N.D.        | 0.72         | 0.42        | N.D.        | 0.66         | N.D.        | 0.28         | N.D.        | 0.09        | N.D.         |             |             | 0.05        |
| 17α(H),21β(H)-22S-Pentakishomohopane | C <sub>35</sub> H <sub>62</sub>                | 482   | 0.35         | N.D.        | 0.76         | 0.43        | N.D.        | 0.79         | N.D.        | 0.41         | N.D.        | 0.05        | N.D.         |             |             | 0.07        |
| 17α(H),21β(H)-22R-Pentakishomohopane | C <sub>35</sub> H <sub>62</sub>                | 482   | 0.18         | N.D.        | 0.52         | 0.27        | N.D.        | 0.49         | N.D.        | 0.19         | N.D.        | 0.03        | N.D.         |             |             | 0.05        |
| <b>Total</b>                         |                                                |       | <b>5.02</b>  |             | <b>10.87</b> | <b>6.46</b> |             | <b>12.48</b> |             | <b>7.36</b>  |             | <b>0.87</b> |              | <b>6.15</b> | <b>4.67</b> | <b>1.23</b> |
| C <sub>31</sub> S/(R+S)              |                                                |       | 0.61         |             | 0.61         | 0.58        |             | 0.59         |             | 0.6          |             | 0.61        |              | 0.6         | 0.01        | 0.61        |
| C <sub>32</sub> S/(R+S)              |                                                |       | 0.46         |             | 0.41         | 0.39        |             | 0.51         |             | 0.46         |             | 0.44        |              | 0.45        | 0.05        | 0.61        |

N.D. = not detected.

$$a = CPI_{(o/e)} = \left( \frac{\sum nC_{odd}}{\sum nC_{even}} \right)$$

b = Calculated as wax C<sub>n</sub> = [C<sub>n</sub>]/[(C<sub>n+1</sub>)+(C<sub>n-1</sub>)] [24]. Bold type = compound totals and maximum concentration for each compound group.

## n-Alkanes

Hydrocarbon alkanes are major fraction in propolis [14–17]. The *n*-alkanes are derived from both biogenic and anthropogenic sources and can be differentiated based on their distribution patterns in samples. Thus, they are useful to assess their source in different samples. Key parameters associated with *n*-alkane sources and characteristics are the well-established carbon preference index (CPI), and the carbon number maximum ( $C_{\max}$ ) of the most abundant *n*-alkane in the homologous series [18]. The CPI of *n*-alkanes can be used to assess the influence of biogenic and anthropogenic inputs [19]. The relative *n*-alkane concentrations ranged from 23.7% to 55.0% with a mean of  $44.2 \pm 9.3\%$  (Table 1) for propolis. These values were less than the control sample (64.0%). The odd-numbered *n*-alkanes were dominant over the entire range and the  $CPI_{o/e}$  varied from 3.6 to 7.7 (mean =  $5.5 \pm 1.5$ , Table 1), which is similar to the value of the control (5.1). They have  $C_{\max}$  at 27 and range from  $C_{17}$  to  $C_{40}$  (Table 1 and Fig 2). This indicates that vascular plants are major sources of the *n*-alkanes, with some contribution from synthetic bee wax for these propolis samples. Plant wax *n*-alkanes have a  $C_{\max}$  in the range of 25–31, which is dependent on the plant species as well as the season and locality [20–22].

For the asphalt, the *n*-alkanes range from  $C_{12}$  to  $C_{36}$  with  $C_{\max}$  at 15 (Fig 3). Their relative concentration was 41.3% and the  $CPI_{o/e} \sim 1.0$ . The asphalt also exhibits an unresolved complex mixture (UCM) of branched and cyclic hydrocarbons with a bimodal distribution and maxima at alkane retention index of  $C_{16}$  (major) and  $C_{32}$  (minor, Fig 3A). This UCM, oily in terms of fluidity, is not significant in the propolis sample extracts.

In order to better evaluate the relative input from various sources, the concentrations of plant wax versus petroleum derived *n*-alkanes [23], and their percentage of the total *n*-alkanes were calculated (Table 1). The amounts of plant wax *n*-alkanes range from 17.8% to 33.6% of the total extracts, whereas the petroleum derived inputs ranged from 6.2% to 21.7%. There is a significant correlation ( $R^2 = 0.84$ ) between wax *n*-alkanes (Fig 4A) and the total *n*-alkanes, which suggests that terrestrial vegetation wax is the major contributor to the total *n*-alkanes in the propolis samples. The CPI also shows a negative correlation ( $R^2 = 0.62$ ) with the ratios of petroleum-to-plant wax (Fig 4B), which supports the effectiveness of CPI as an indicator of biogenic sources from plant waxes versus petroleum hydrocarbon inputs.

## n-Alkenes

Recent studies showed that *n*-alkenes are present in both bee wax and propolis [16,17,24]. They are mainly hentriacontene ( $C_{31:1}$ ) and tritriacontene ( $C_{33:1}$ ) [24]. The *n*-alkenes ( $\Delta^1$  or  $\Delta^9$ ) were major compounds in these propolis samples and ranged from  $C_{25}$  to  $C_{35}$  with a  $C_{\max}$  at 33. The relative concentrations varied from 23.8% to 41.2% with a mean of  $35.3 \pm 5.2\%$ , and were higher than their relative concentration (14.8%) in the control sample. The odd carbon numbered *n*-alkenes were dominant with a  $CPI_{o/e}$  of 12.4 to 31.4 (mean =  $18.6 \pm 5.7$ ), and similar to the value (19.1) of the control. The distribution of *n*-alkenes with major concentrations of the odd numbered homologues and  $C_{\max}$  at 33 suggests an origin from insect wax [25,26], possibly derived by alteration of long chain *n*-alkanols. The asphalt extract contained only traces on *n*-alkenes mainly from  $C_{13}$ – $C_{23}$  (Table 1).

## n-Alkanals

*n*-Alkanals were detected in these propolis samples as minor compounds. They ranged from 0.44% to 5.9% with a mean value of  $3.2 \pm 1.7\%$  of the total extracts (Table 1) and had various chain length dominances. They were trace components in the control sample. Only even-numbered *n*-alkanal were observed ranging from  $C_{24}$  to  $C_{30}$ . The *n*-alkanal are intermediates in

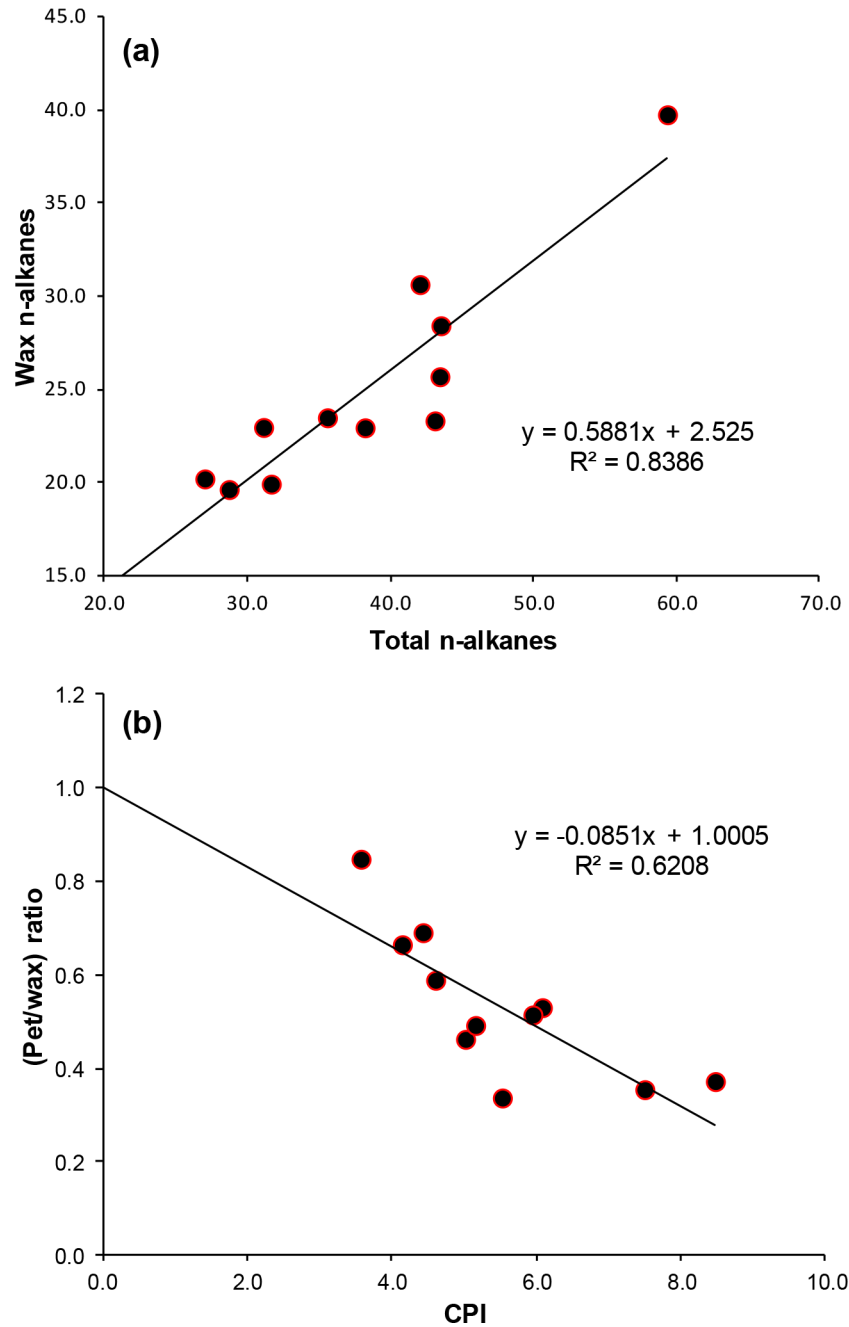

**Fig 4. Plots showing the relationships between (a) wax n-alkanes versus total n-alkanes and (b) petroleum-to-biogenic n-alkane ratios versus CPI of n-alkanes.**

doi:10.1371/journal.pone.0128311.g004

the biochemical synthesis of n-alkanols and are minor components of higher plant waxes [27]. The n-alkanals were not detectable in the asphalt samples.

### Methyl n-alkanoates

The methyl n-alkanoates were also significant compounds at relative concentrations of 3.1% to 33.2% with a mean of  $9.5 \pm 9.5\%$  (Table 1), and in the control sample with a relative

concentration of 12.3%. They ranged from  $C_{13}$  to  $C_{27}$  with  $C_{max}$  at methyl *n*-hexadecanoate (16) and *n*-octadecenoate (18:1). The methyl *n*-alkanoates had solely an even carbon number predominance (as the alkanolic acids, [Table 1](#)), indicating that they are originally from natural biogenic sources [[28,29](#)]. Alkanolic acids, with hexadecanoic as major acid, have been reported in other propolis samples [[16,17](#)]. No methyl *n*-alkanoates nor *n*-alkanoic acids were detectable in the asphalt extract.

### Long chain wax esters

Long chain wax esters were detected in these samples with relative concentrations of 0.45% to 5.04%, mean  $2.4 \pm 1.5\%$ , and consisting mainly of tetracosyl-, hexacosyl- and octacosyl hexadecanoates, where hexacosyl hexadecanoate was dominant ([Table 1](#)). They were relatively low (0.49%) in the control sample from Al-Bahah, and have also been reported as minor components of other propolis samples [[17](#)]. Long chain wax esters are likely derived from waxes secreted by the bees [[30](#)] or from lipid components of vascular plants of the region [[31–33](#)]. Waxes secreted by bees contain more than 15% of wax esters and generally include tetradecyl dodecanoate, tetradecanoate and hexadecanoate, as well as hexadecyl tetradecanoate and hexadecanoate [[34](#)]. The non-hydrocarbon components of higher plant waxes are generally alcohols (40%) in younger plants and mainly wax esters (42%) in older plants [[35,36](#)]. Besides the geographical location, the vegetation wax ester composition also depends on the plant species [[5](#)]. Wax esters were not detectable in the asphalt extract.

### Triterpenoids

Triterpenoids were detected in the propolis samples with relative concentrations of 0.24% to 4.3%, mean  $1.4 \pm 1.3\%$ , consisting mainly of  $\alpha$ - and  $\beta$ -amyrone, amyryns, and amyryl acetates ([Table 1](#)). They were significant with a relative concentration of 4.67% in the control sample.  $\alpha$ -Amyrone and  $\beta$ -amyryl acetate were the major triterpenoids ([Table 1](#)). The variation in the contents is likely due to different plant species of the same family. These triterpenoids were also reported for propolis samples from Brazil, Egypt, Cuba and Ethiopia [[37–41](#)], but were not detectable in the asphalt. Obviously, the main source of triterpenoids in propolis is from the regional vegetation.

### Hopanes

Hopanes were found in many of these propolis samples with concentrations ranging from 0.0 to 12.5% (mean =  $6.2 \pm 4.7\%$ , [Table 1](#)). These compounds were not detected in the control sample from the Al-Bahah region. The presence of hopane hydrocarbons in propolis has not been reported and is of interest because it indicates an input of petroleum products, especially less volatile sticky material such as tar and asphalt. Fossil or geo-hopanes are usually resistant to degradation and alteration in the environment and can be used as tracers to indicate pollution from the utilization of petroleum and its products in environmental samples [[42–44](#)]. The hopane hydrocarbons in these samples had the thermodynamically more stable  $17\alpha(H),21\beta(H)$  configuration, ranging from  $C_{27}$  to  $C_{35}$  (no  $C_{28}$ ), with  $C_{30}$  maximum, and minor  $17\beta(H),21\alpha(H)$ -hopanes (Figs [2C](#) vs. [3C](#)), typical of crude oils and products [[42–45](#)]. These cyclic hydrocarbons are derived from the diagenetic interconversion of the  $17\beta(H),21\beta(H)$ -hopane precursors of bacterial origins over geological times [[45](#)]. The distributions of the hopanes  $> C_{31}$  all showed the typically mature C-22 R/S epimer pairs [[43,46](#)]. The ratios of C-22 S/(S+R) for the  $C_{31}$  and  $C_{32}$  hopanes ranged from 0.59 to 0.60 (mean =  $0.60 \pm 0.01$ ) and from 0.39 to 0.46 (mean  $0.45 \pm 0.05$ ) ([Table 1](#)), respectively. These values are in the same range as hopanes in mature crude oils or hydrothermal petroleum [[45–49](#)], supporting their origin

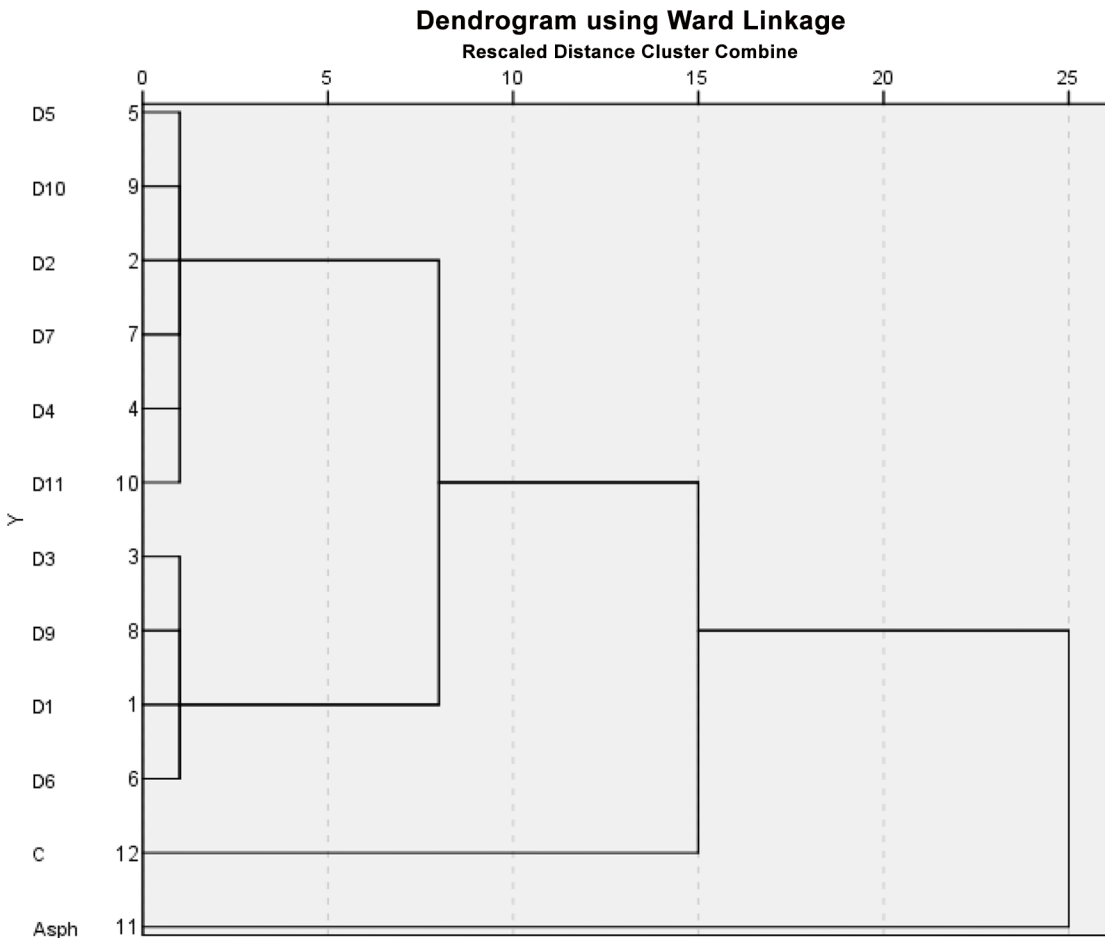

**Fig 5. Plot showing the statistical output of cluster analysis.**

doi:10.1371/journal.pone.0128311.g005

from petroleum products. The asphalt sample from the hive region had a relative concentration of hopanes of 1.23% (Fig 3C). The C-22 S/(S+R) ratio for C<sub>31</sub> and C<sub>32</sub> was 0.61 for both, similar as the distribution and ratio of the propolis samples. This confirms that the bees have used asphalt as one of the ingredients to make propolis for their hives, particularly with the other natural sources being scarce.

Steranes, the other fossil fuel tracers originating from sterols over geological times, are also common in asphalts [44,45]. However, steranes were not detectable in this asphalt sample nor in any of the propolis samples of this study, providing indirect evidence, in conjunction with the presence of hopanes and petroleum derived *n*-alkanes, that asphalt was utilized as a propolis component.

Soil and sand particles contain a variety of anthropogenic and natural organic components, and in urban areas can be considered pollutant collectors [50–52]. Small particles of soil and sand can be resuspended into the air and transported by wind to different places. To confirm that dust from the surrounding area or long distance transported atmospheric particulate matter (PM) are not the contributors of hopanes in these propolis samples, surface soil samples were taken from two areas in Riyadh as well as an atmospheric PM sample (S1 Fig). The major anthropogenic compounds of the soil and atmospheric PM samples were plasticizers for the

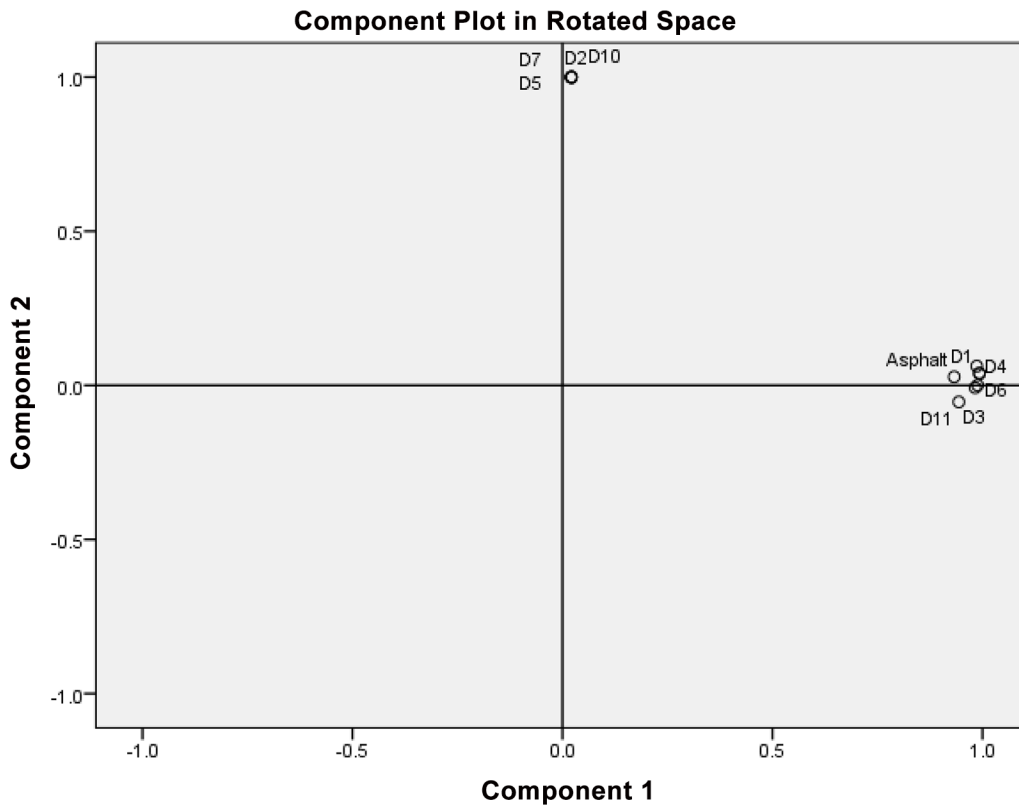

**Fig 6. Plot showing the statistical output of principal component analysis (PCA).**

doi:10.1371/journal.pone.0128311.g006

two surface soil and the atmospheric PM samples, ranging from 29.3% to 74.7% (S2 Fig and S1 Table). n-Alkanes were 11% and 17% in the D-S and O-S soil samples, respectively, and 26% in the atmospheric PM. The relative concentrations of the unresolved complex mixture (UCM) were relatively lower in the soil samples (2.2% for D-S and 5.09% for O-S) than in the atmospheric PM (29.3%). The hopane and sterane biomarkers were detected at trace amounts in the soil sample near the bee hives and as major compounds in the soil sample from the city center and in the atmospheric PM (S3 Fig and S1 Table). The absence of plasticizers and sterane biomarkers, which were major compounds in the soil (O-S) and atmospheric PM samples, in propolis and asphalt verify that the source of the hopanes in propolis is mainly from asphalt collected by bees and not from transported dust. Furthermore, if the major source of contaminants in propolis were from dust then hopanes should have been detected in all propolis samples. Further support that dust is not a major contributor to propolis contaminants is the presence of traces of both hopane and sterane biomarkers in the surface soil sample from the site near the bee hives, which is not consistent with the occurrence of hopanes as major compounds and the absence of steranes in the propolis. Also, it is notable that traces of UCM were detected only in propolis samples that contain hopanes (S1 Table), indicating that both are originally from the asphalt.

### Statistical analysis

The output of the cluster analysis is shown in Fig 5 where four separate sample clusters were recognized. The first cluster included six propolis samples, the second one included four propolis samples, and third and fourth included the asphalt and the control as single samples. The underlying

structure of the data set was explained by the output of the PCA in Fig 6. The ordination plots of the propolis samples showed a clear separation of the samples: asphalt, D1, D3, D4, D6, D9 and D11 from the samples: control, D2, D5, D7 and D10. The two principal vectors (Fig 6) showed only two clusters along axes 1 and 2. The separation in the data set was evident and confirmed a dissimilarity among the different propolis samples, which was clearly shown in Fig 6. The reproduced correlation coefficients between asphalt and propolis D1, D3, D4, D6, D9 and D11 were significant ( $R^2 = 0.917-0.927$ ). The Quartimax with Kaiser Normalization of components 1 and 2 ranged from 0.986 to 0.993 and from -0.054 to 0.037 for the samples D1, D3, D4, D9 and D11, respectively.

Obviously, the sources of organic matter of these propolis samples are mainly compounds from terrestrial plants, some altered by bees or chemical processes, and asphalt. The inputs from plant wax were calculated as the sum of plant wax *n*-alkanes, triterpenoids and wax esters; the compounds altered by bees as the sum of *n*-alkenes, *n*-alkanals and methyl *n*-alkanoates; and the inputs from asphalt as the sum of hopanes, UCM and petroleum *n*-alkanes. The contribution of asphalt was evident in the propolis samples as shown in Fig 7 and ranged from 11.5% to 24.0% (mean =  $18.8 \pm 4.5\%$ ). The local vegetation contributed from 34.2% to 48.1%

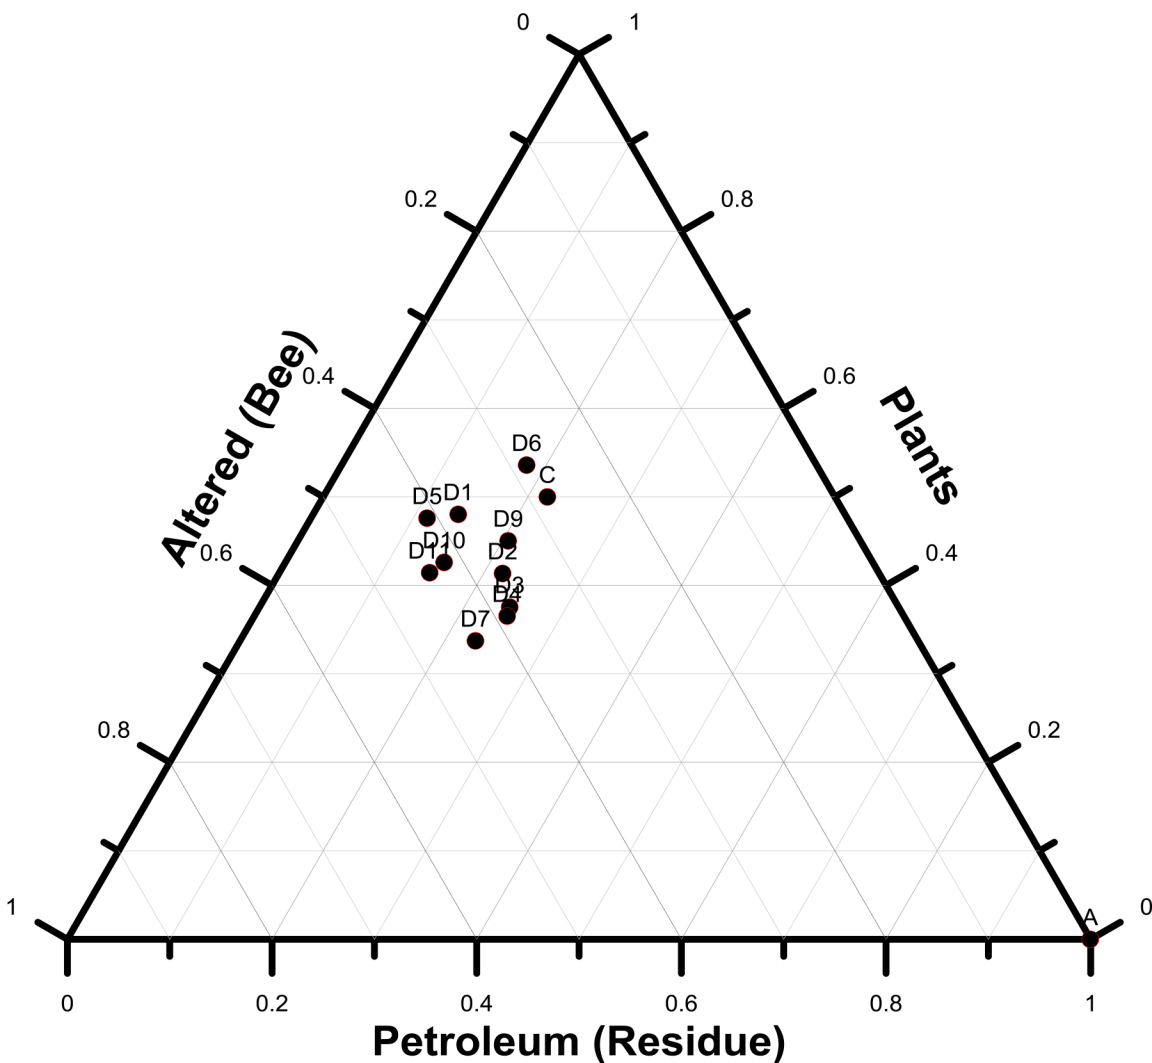

**Fig 7. Ternary diagram showing the compound compositions from petroleum residues, altered products and natural plant wax.**

doi:10.1371/journal.pone.0128311.g007

(mean = 42.8 $\pm$ 6.6%) and the compounds altered by chemical processes and/or bee metabolism ranged from 29.3% to 44.4% (mean = 38.4 $\pm$ 4.7%) (Fig 7). The collection of asphalt by bees to make propolis, when resin is scarce, is likely driven by the similar aroma and/or dark color of resin and asphalt or the stick factor (viscosity).

## Conclusion

The hexane-extractable aliphatic lipids present in propolis samples from Riyadh and an asphalt sample from the hive vicinity have been characterized using GC-MS techniques. Inputs of wax from vascular higher plants and asphalt residues, as well as compounds altered by bee metabolism are obvious in the propolis samples. The contributions from asphalt are detectable as confirmed by the presence of hopanes and petroleum-derived *n*-alkanes. The *n*-alkanes (odd carbon dominance  $>C_{25}$ ), wax esters and triterpenoids indicate a dominant input from vascular higher plant wax, whereas *n*-alkenes, methyl *n*-alkanoates and *n*-alkanals likely maybe compounds altered by the bees.

## Supporting Information

**S1 Fig. Map showing the site locations of the surface soil samples D-S and O-S and the atmospheric particulate matter (D-PM) sample.**

(DOC)

**S2 Fig. GC-MS total ion current traces of total SOM extracts of soil samples from Riyadh: (a) D-S from the BRU site near the honey bee hives and (b) from the city center (D-S), and atmospheric PM from the two-story building near BRU (c) D-PM (Numbers refer to the carbon chain length of *n*-alkanes and symbols are I = isobutyl-, II = dibutyl-, III = diethyhexyl phthalate, A = Triphenyl phosphate, B = Monotolyl diphenyl phosphate, C = Monophenyl ditotyl phosphate, H = hopane).**

(DOC)

**S3 Fig. Examples of typical GC-MS key ion plots for hopanes, *m/z* 191: (a) D-S, (b) O-S and (c) D-PM, and for steranes, *m/z* 217 and 218: (e) D-S, (f) O-S and (g) D-PM.**

(DOC)

**S1 Table. Relative concentrations (%) of major anthropogenic components in propolis, soil, and air particulate matter (PM) samples from Riyadh, Saudi Arabia.**

(DOC)

## Acknowledgments

This project was funded by the National Plan for Scientific Technology and Innovation (MAARIFAH), King Abdulaziz City for Science and Technology, Kingdom of Saudi Arabia, Awards Numbers (12-AGR2510.02 and 09-ENV842-02). BRTS thanks the Distinguished Scientist Program of King Saud University for partial support.

## Author Contributions

Conceived and designed the experiments: AIR ASA. Performed the experiments: AIR HSR AAO. Analyzed the data: AIR BRTS ASA. Contributed reagents/materials/analysis tools: AIR AHE. Wrote the paper: AIR BRTS.



## References

- Marcucci MC. Propolis: chemical composition, biological properties and therapeutic activity. *Apidologie*. 1995; 26: 83–99.
- Simone M, Evans JD, Spivak M. Resin collection and social immunity in honey bees. *Evolution* 2009; 63: 3016–3022. doi: [10.1111/j.1558-5646.2009.00772.x](https://doi.org/10.1111/j.1558-5646.2009.00772.x) PMID: [19619221](https://pubmed.ncbi.nlm.nih.gov/19619221/)
- Banskota AH, Tezuka Y, Kadota S. Recent progress in pharmacological research of propolis. *Phytother Res*. 2001; 15: 561–571. PMID: [11746834](https://pubmed.ncbi.nlm.nih.gov/11746834/)
- Simon-Finistrom M, Spivak M. Propolis and bee: the natural history and significance of resin use by honey bees. *Apidologie*. 2010; 41: 295–311.
- Sforcin JM, Bankova V. Propolis: Is there a potential for the development of drugs? *J Ethnopharmacol*. 2011; 133: 253–260. doi: [10.1016/j.jep.2010.10.032](https://doi.org/10.1016/j.jep.2010.10.032) PMID: [20970490](https://pubmed.ncbi.nlm.nih.gov/20970490/)
- Kujumgiev A, Tsvetkova I, Serkedjieva Y, Bankova V, Christov R, Popov S. Antibacterial, antifungal and antiviral activity of propolis of different geographic origin. *J. Ethnopharmacol*. 1999; 64: 235–240. PMID: [10363838](https://pubmed.ncbi.nlm.nih.gov/10363838/)
- Cirasino L, Pisati A, Fasani F. Contact dermatitis from propolis. *Contact Dermatitis*. 1987; 16: 110–111. PMID: [3568635](https://pubmed.ncbi.nlm.nih.gov/3568635/)
- Monti M, Berti E, Carminati G, Cusini M. Occupational and cosmetic dermatitis from propolis. *Contact Dermatitis*. 1983; 9: 163. PMID: [6851536](https://pubmed.ncbi.nlm.nih.gov/6851536/)
- Popova M, Trusheva B, Antonova D, Cutajar S, Mifsud D, Farrugia C, et al. The specific chemical profile of Mediterranean propolis from Malta. *Food Chem*. 2011; 126: 1431–1435.
- de Castro SL. Propolis: biological and pharmacological activities. Therapeutic uses of this bee-product. *Annual Review Biomed. Sci*. 2001; 3: 49–83.
- Fokt H, Pereira I A, Ferreira AM, Cunha A, Aguiar C. How do bees prevent hive infections? The antimicrobial properties of propolis. In: Mendez-Vials A, editor. *Current Research, Technology and Education Topics in Applied Microbiology and Microbial Biotechnology*. Vol. 1. 2010. pp 481–493.
- Nyein MM. The use of asphalt as a propolis substitute. *Amer. Bee J*. 1983; 123: 732–732.
- Abd El-Mawla AMA, Osman HE. HPLC analysis and role of the Saudi Arabian propolis in improving the pathological changes of kidney treated with monosodium glutamate. *Spatula DD*. 2011; 1(3): 119–127.
- Nelson DR, Blomquist GJ. Insect waxes, in: Hamilton RJ, editor. *Waxes: Chemistry, Molecular Biology and Functions*, The Oily Press, Dundee, WA, 1995. pp. 1–90.
- Bankova V, Dylgerov A, Popov S, Evstatieva L, Kuleva L, Pureb O, et al. Propolis produced in Bulgaria and Mongolia: phenolic composition and plant origin. *Apidolog*. 1992; 23: 79–85.
- Negri G, Marcuccia MC, Salatino A, Salatino MLF. Comb and propolis waxes from Brazil (States of São Paulo and Paraná). *J. Braz. Chem. Soc*. 2000; 11: 453–457.
- Custadio AR, Ferreira MMC, Negri G, Salatino A. Clustering of comb and propolis waxes based on the distribution of aliphatic constituents. *J. Braz. Chem. Soc*. 2003; 14: 354–357.
- Mazurek MA, Simoneit BRT. Characterization of biogenic and petroleum-derived organic matter in aerosols over remote, rural, and urban areas. In: Keith LH, editor. *Identification and Analysis of Organic Pollutants in Air*. Ann Arbor Science, Woburn, 1984 pp. 353–370.
- Simoneit BRT. Organic matter of troposphere—V: Application of molecular marker analysis to biogenic emissions into the troposphere for source reconciliations. *J. Atmos. Chem*. 1989; 8: 251–275.
- Eglinton G, Hamilton RJ. Leaf epicuticular waxes. *Science* 1967; 156: 1322–1335. PMID: [4975474](https://pubmed.ncbi.nlm.nih.gov/4975474/)
- Simoneit BRT. The organic chemistry of marine sediments. In: Riley JP, Chester R, editors. *Chemical Oceanography*, 2nd edn. Academic Press, New York, 1978. pp. 233–311.
- Ficken KJ, Li B, Swain DE, Eglinton G. An n-alkane proxy for the sedimentary input of submerged/floating fresh water aquatic macrophytes. *Org. Geochem*. 2000; 31: 745–759.
- Simoneit BRT, Crisp PT, Mazurek MA, Standley LJ. Composition of extractable organic matter of aerosols from the Blue Mountains and southeast coast of Australia. *Environ. Int*. 1991; 17: 405–419.
- Negri G, Marcucci MC, Salatino A, Salatino MLF. Hydrocarbons and monoesters of propolis waxes from Brazil. *Apidologie*. 1998; 29: 305–314.
- Jackson LL. Cuticular lipids of insects—IV. Hydrocarbons of the cockroaches *Periplaneta japonica* and *Periplaneta americana* compared to other cockroach hydrocarbons. *Comparative Biochemistry and Physiology Part B: Comp Biochem*. 1972; 41: 331–336.
- Jackson L.L, Baker GL. Cuticular lipids of insects. *Lipids* 1970; 5: 239–246.
- Kolattukudy PE, Croteau R, Buckner JS. Biochemistry of plant waxes. In: Kolattukudy PE editor. *Chemistry and Biochemistry of Natural Waxes*. Elsevier, Amsterdam, 1976; 289–347.

28. Harwood JL, Russell NJ. Lipids in Plants and Microbes. George Allen and Unwin, London 1984.
29. Tulloch AP. Beeswax: Structure of the esters and their component acids and diols. *Chem and Phys Lipids*. 1971; 6: 235–265.
30. Baker EA Chemistry and morphology of plant epicuticular waxes. In: Cutler DF, Alvin KL, Price CE, editors. *The Plant Cuticle*. Academic Press, London 1982.
31. Kolattukudy PE. *Chemistry and Biochemistry of Natural Waxes*. Elsevier, Amsterdam. 1976. 459 pp.
32. Hamilton RJ. *Waxes: Chemistry, Molecular Biology and Functions*. The Oily Press, Dundee, WA 1995.
33. Katzav-Gozansky T, Soroker V, Hefetz A. Plasticity of caste-specific Dufour's gland secretion in the honey bee (*Apis mellifera* L.). *Naturwissenschaften* 1997; 84: 238–241.
34. Avato P, Bianchi G, Pogna N. Chemosystematics of surface lipids from maize and some related species. *Phytochem*. 1990; 29: 1571–1576.
35. Bianchi G, Avato P, Scarpa O, Murelli C, Audisio G, Rossini A. Composition and structure of maize epicuticular wax esters. *Phytochem*. 1989; 28: 165–171.
36. Abd El-Hady FK, Hegazi AG. Egyptian propolis: 2. Chemical composition, antiviral and antimicrobial activities of East Nile Delta propolis. *Z. Naturforsch*. 2002; 57c: 386–394.
37. Christov R, Bankova V, Hegazi A, Abd El-Hady F, Popov S. Chemical composition of Egyptian propolis. *Z. Naturforsch*. 1998; 53c: 197–200.
38. Hegazi AG, El-Hady FKA. Egyptian propolis: 3. Antioxidant, antimicrobial activities and chemical composition of propolis from reclaimed lands. *Z. Naturforsch*. 2002; 57c: 395–402.
39. Marcucci MC, Rodriguez J, Ferreres F, Bankova V, Groto R, Popov S. Chemical composition of Brazilian propolis from São Paulo state. *Z. Naturforsch*. 1998; 53c: 117–119.
40. Márquez-Hernández I, Cuesta-Rubio O, Campo-Fernández M, Rosado-Perez A, Montes de Oca-Porto R, Piccinelli AL, et al. Studies on the constituents of yellow Cuban propolis: GC-MS determination of triterpenoids and flavonoids. *J. Agri. Food Chem*. 2010; 58: 4725–4730. doi: [10.1021/jf904527n](https://doi.org/10.1021/jf904527n) PMID: [20230059](https://pubmed.ncbi.nlm.nih.gov/20230059/)
41. Rushdi AI, Adgaba NM, Bayaqoob NIM, Al-Khazim A, Simoneit BRT, El-Mubarak AH, et al. Characteristics and chemical compositions of propolis from Ethiopia. *SpringerPlus* 2014; 3: 253–261. doi: [10.1186/2193-1801-3-253](https://doi.org/10.1186/2193-1801-3-253) PMID: [24926420](https://pubmed.ncbi.nlm.nih.gov/24926420/)
42. Simoneit BRT. Organic matter of the troposphere—III. Characterization and sources of petroleum and pyrogenic residues in aerosols over the Western United States. *Atmos. Environ*. 1984; 18: 51–67.
43. Simoneit BRT, Sheng G, Chen X, Fu J, Zhang J, Xu Y. Molecular marker study of extractable organic matter in aerosols from urban areas of China. *Atmos. Environ*. 1991; 25A: 2111–2129.
44. Faure P, Landais P, Schlepp L, Michels R. Evidence for diffuse contamination of river sediments by asphalt particles. *Environ. Sci. Tech*. 2000; 34: 1174–1181.
45. Peters KE, Moldowan JM. *The Biomarker Guide: Interpreting Molecular Fossils in Petroleum and Ancient Sediments*. Prentice-Hall, Englewood Cliffs 1993.
46. Simoneit BRT, Cardoso JN, Robinson N. An assessment of the origin and composition of higher molecular weight organic matter in aerosols over Amazonia. *Chemosph*. 1990; 21: 1285–1301.
47. Kvenvolden KA, Rapp JB, Hostettler FD. Hydrocarbon geochemistry of hydrothermally-generated petroleum from Escanaba Trough, offshore California, U.S.A. *Appl. Geochem*. 1990; 5: 83–91.
48. Rushdi AI, Simoneit BRT. Hydrothermal alteration of organic matter in sediments of the Northeastern Pacific Ocean: Part 1. Middle Valley, Juan de Fuca Ridge. *Appl. Geochem*. 2002; 17: 1401–1428.
49. Rushdi AI, Simoneit BRT. Hydrothermal alteration of organic matter in sediments of the Northeastern Pacific Ocean: Part 2. Gorda Ridge, Escanaba Trough. *Appl. Geochem*. 2002; 17: 1467–1494.
50. Rushdi AI, Al-Mutlaq K, Simoneit BRT. Sources of organic compounds in fine soil and sand particles during winter in the metropolitan area of Riyadh, Saudi Arabia. *Arch. Environ. Contamin. Toxicol*. 2005; 49: 457–470. PMID: [16205991](https://pubmed.ncbi.nlm.nih.gov/16205991/)
51. Rogge WF, Medeiros PM, Simoneit BRT. Organic marker compounds for soil and fugitive dust from open lot dairies and cattle feed lots. *Atmos. Environ*. 2006; 40: 27–49.
52. Rogge WF, Medeiros PM, Simoneit BRT. Organic marker compounds in surface soils of crop fields from the San Joaquin Valley fugitive dust characterization study. *Atmos. Environ*. 2007; 41: 8183–8204.
